# Supplementary material for: Impact of a second medical opinion on the therapeutic and costs management of lumbar pathologies : a study based on a French cohort
Source: Research Square preprint supplement (doi:10.21203/rs.3.rs-6653339/v1), 2025-06-18
Supplement: Supplementary file 1 [file aec52de94d3c842bbf9efd38.xlsx]

## Sheet: Feuil1
Ordre	Question	Description	Type	Filtre âge	Réponses	Réponse liée
1	Quel premier avis vous a été donné : merci d'indiquer précisément le diagnostic et le traitement proposé		text	Tous
2	Avez-vous mis votre médecin traitant au courant de votre démarche ?		radio	Tous	Oui, J'ai un médecin traitant, mais il n'est pas au courant, Je n'ai pas de médecin traitant
3	Quelle est votre taille (en cm) ?		text	Tous
4	Quel est votre poids (en kg) ?		text	Tous
5	Avez-vous un handicap ?		checkbox	Tous	Oui, autisme, Oui, déficience intellectuelle, Oui, handicap moteur, Oui, handicap visuel, Oui, handicap auditif, Oui, polyhandicap, Non
6	Quelle est votre catégorie socio-professionnelle ?		select	Tous	Agriculteurs exploitants, Artisans, commerçants et chefs d’entreprise, Cadres et professions intellectuelles supérieures, Employés, Ouvriers, Professions intermédiaires, Retraités, Sans activité professionnelle, Etudiants, Autres
7	Avez-vous une activité professionnelle ?		radio	Tous	Oui, Non
8	>> Quelle est votre profession ?		text	Tous		Oui
10	>> Avez-vous eu un accident du travail ou une maladie professionnelle ?		radio	Tous	Oui, Non	Oui
11	>> >> Précisez		text	Tous		Oui
12	>> Etes-vous actuellement en arrêt de travail du fait de votre maladie ?		radio	Tous	Oui, Non	Oui
13	>> Depuis quand ?		text	Tous		Oui
14	>> Avez-vous été en arrêt de travail durant les 12 mois écoulés à cause de votre maladie ?		radio	Tous	Oui, Non	Oui
15	>> Combien de mois ?		text	Tous		Oui
16	Fumez-vous ?		radio	Tous	Oui, Non
17	>> Combien de cigarettes par jour ?		text	Tous		Oui
18	>> Depuis combien de temps fumez-vous ?		text	Tous		Oui
19	Combien de fois vous arrive-t-il de boire une boisson alcoolisée ?		radio	Tous	Jamais, 1 à 4 fois par mois, 3/4 fois par semaine, Tous les jours
20	Précisez le nombre de verres que vous buvez quotidiennement et le type d'alcool		text	Tous
21	Quel sport pratiquez-vous (compétition, loisir, amateur, sédentaire) ? A quelle fréquence ?		text	Tous
22	Avez-vous des allergies (médicament, latex, produit pour la radiologie, produit d'anesthésie, aliment, autre) ?		radio	Tous	Oui, Non
23	>> Précisez les allergènes et vos symptômes	Par exemple : œdème de la gorge ou d’un membre, rougeur cutanée, démangeaison, troubles respiratoires, ...	text	Tous		Oui
24	Avez-vous des antécédents chirurgicaux sur le rachis ?		radio	Tous	Oui, Non
25	>> Précisez le type d'intervention et la date		text	Tous		Oui
26	Avez-vous d'autres antécédents chirurgicaux en dehors du rachis ? Précisez		text	Tous
27	Avez-vous un ou plusieurs des antécédents médicaux suivants :		checkbox	Tous	Maladies cardiaques (coronaires, valves, cœur), Maladies pulmonaires, Artérite des membres inférieurs, Autres maladies vasculaires (Accident vasculaire cérébral, phlébite, embolie pulmonaire), Troubles neurologiques (accident vasculaire cérébral, déficit musculaire, autre), Ulcère gastroduodénal, Maladies du foie (cirrhose, hépatite B, autre), Maladies rénales (calcul rénaux, insuffisance rénale,…
28	>> Précisez les antécédents et leur date de survenue		text	Tous		Maladies cardiaques (coronaires, valves, cœur)
29	>> Précisez les antécédents et leur date de survenue		text	Tous		Maladies pulmonaires
30	>> Précisez les antécédents et leur date de survenue		text	Tous		Artérite des membres inférieurs
31	>> Précisez les antécédents et leur date de survenue		text	Tous		Autres maladies vasculaires (Accident vasculaire cérébral, phlébite, embolie pulmonaire)
32	>> Précisez les antécédents et leur date de survenue		text	Tous		Troubles neurologiques (accident vasculaire cérébral, déficit musculaire, autre)
33	>> Précisez les antécédents et leur date de survenue		text	Tous		Ulcère gastroduodénal
34	>> Précisez les antécédents et leur date de survenue		text	Tous		Maladies du foie (cirrhose, hépatite B, autre)
35	>> Précisez les antécédents et leur date de survenue		text	Tous		Maladies rénales (calcul rénaux, insuffisance rénale, autre)
36	>> Précisez les antécédents et leur date de survenue		text	Tous		Troubles ostéo-articulaires
37	>> Précisez les antécédents et leur date de survenue		text	Tous		Maladies gynécologiques ou des organes sexuels
38	>> Précisez les antécédents et leur date de survenue		text	Tous		Autres
39	Vous pouvez marcher au maximum sans faire de pause (temps ou distance) :		text	Tous
40	Vous pouvez tenir assis sans vous lever (temps) :		text	Tous
41	Vous pouvez rester debout sans vous asseoir (temps) :		text	Tous
42	Combien de temps pouvez-vous conduire une voiture sans pause :		text	Tous		Oui, des douleurs sciatiques (douleurs qui descendent depuis le bas de la colonne dans les cuisses, les jambes / mollets et parfois jusque dans les pieds = cruralgie)
43	Vous parvenez à monter et descendre les escaliers :		radio	Tous	Normalement, Marche par marche comme les petits enfants, Seulement avec la rampe, Impossible
44	Avez-vous des douleurs lombaires ou sciatiques...		radio	Tous	Oui, des douleurs lombaires (douleurs "dans les reins" = lombalgie), Oui, des douleurs sciatiques (douleurs qui descendent depuis le bas de la colonne dans les cuisses, les jambes / mollets et parfois jusque dans les pieds = cruralgie), Les deux, des douleurs lombaires et sciatiques, Non
45	>> Depuis combien de temps avez-vous des douleurs lombaires ?		text	Tous		Oui, des douleurs lombaires (douleurs "dans les reins" = lombalgie)
46	>> Comment sont ces douleurs lombaires ?		radio	Tous	Par crise, Permanentes, Les 2 combinés	Oui, des douleurs lombaires (douleurs "dans les reins" = lombalgie)
47	>> Précisez l'intensité de vos douleurs lombaires :	10 étant l'intensité la plus forte	slider (0-10)	Tous		Oui, des douleurs lombaires (douleurs "dans les reins" = lombalgie)
48	>> Qu'est-ce qui déclenche vos douleurs lombaires ?		checkbox	Tous	Position debout, Position assise, La marche, Couché(e) la nuit, Dès que je m'assois, mes douleurs à la marche se calment et je peux repartir quelques temps, Après m'être endormi(e), je suis réveillé(e) la nuit par des douleurs lombaires, Lorsque je tousse, que j'éternue, ou que je vais à la selle, Rien de particulier	Oui, des douleurs lombaires (douleurs "dans les reins" = lombalgie)
49	>> Vos douleurs lombaires vous empêchent de marcher plus de (temps ou distance) sans pause :		text	Tous		Oui, des douleurs lombaires (douleurs "dans les reins" = lombalgie)
50	>> Y a-t-il une position qui calme ces douleurs lombaires ?		radio	Tous	Oui, Non	Oui, des douleurs lombaires (douleurs "dans les reins" = lombalgie)
51	>> >> Quelle position ?		checkbox	Tous	Couchée sur le dos, Couchée sur le ventre, Couchée en chien de fusil, Assise, Debout, En marchant, Autre	Oui
52	>> Depuis combien de temps avez-vous des douleurs sciatiques ?		text	Tous		Oui, des douleurs sciatiques (douleurs qui descendent depuis le bas de la colonne dans les cuisses, les jambes / mollets et parfois jusque dans les pieds = cruralgie)
53	>> Ces douleurs sciatiques sont principalement :		radio	Tous	A droite, A gauche, Des 2 côtés	Oui, des douleurs sciatiques (douleurs qui descendent depuis le bas de la colonne dans les cuisses, les jambes / mollets et parfois jusque dans les pieds = cruralgie)
54	>> Vos douleurs sciatiques sont principalement situées :		checkbox	Tous	Derrière la ou les cuisses, Sur le devant la ou les cuisses, Sur le coté extérieur la ou les cuisses, Derrière le ou les mollets, Sur le coté extérieur le ou les mollets, Sur le dos du ou des pieds, Sur le bord externe du ou des pieds, Autre	Oui, des douleurs sciatiques (douleurs qui descendent depuis le bas de la colonne dans les cuisses, les jambes / mollets et parfois jusque dans les pieds = cruralgie)
55	>> Comment sont ces douleurs sciatiques ?		radio	Tous	Par crise, Permanentes, Les 2 combinés	Oui, des douleurs sciatiques (douleurs qui descendent depuis le bas de la colonne dans les cuisses, les jambes / mollets et parfois jusque dans les pieds = cruralgie)
56	>> Qu'est-ce qui déclenche vos douleurs sciatiques ?		checkbox	Tous	Position debout, Position assise, La marche, Couché(e) la nuit, Dès que je m'assois, mes douleurs à la marche se calment et je peux repartir quelques temps, Après m'être endormi(e), je suis réveillé(e) la nuit par des douleurs sciatiques, Lorsque je tousse, que j'éternue, ou que je vais à la selle, Rien de particulier	Oui, des douleurs sciatiques (douleurs qui descendent depuis le bas de la colonne dans les cuisses, les jambes / mollets et parfois jusque dans les pieds = cruralgie)
57	>> Précisez l'intensité de vos douleurs sciatiques :	10 étant l'intensité la plus forte	slider (0-10)	Tous		Oui, des douleurs sciatiques (douleurs qui descendent depuis le bas de la colonne dans les cuisses, les jambes / mollets et parfois jusque dans les pieds = cruralgie)
58	>> Y a-t-il une position qui calme ces douleurs sciatiques ?		radio	Tous	Oui, Non	Oui, des douleurs sciatiques (douleurs qui descendent depuis le bas de la colonne dans les cuisses, les jambes / mollets et parfois jusque dans les pieds = cruralgie)
59	>> >> Quelle position ?		checkbox	Tous	Couchée sur le dos, Couchée sur le ventre, Couchée en chien de fusil, Assise, Debout, En marchant, Autre	Oui
60	>> Depuis combien de temps avez-vous des douleurs lombaires ?		text	Tous		Les deux, des douleurs lombaires et sciatiques
61	>> Comment sont ces douleurs lombaires ?		radio	Tous	Par crise, Permanentes, Les 2 combinés	Les deux, des douleurs lombaires et sciatiques
62	>> Précisez l'intensité de vos douleurs lombaires :	10 étant l'intensité la plus forte	slider (0-10)	Tous		Les deux, des douleurs lombaires et sciatiques
63	>> Qu'est-ce qui déclenche vos douleurs lombaires ?		checkbox	Tous	Position debout, Position assise, La marche, Couché(e) la nuit, Dès que je m'assois, mes douleurs à la marche se calment et je peux repartir quelques temps, Après m'être endormi(e), je suis réveillé(e) la nuit par des douleurs lombaires, Lorsque je tousse, que j'éternue, ou que je vais à la selle, Rien de particulier	Les deux, des douleurs lombaires et sciatiques
64	>> Y a-t-il une position qui calme ces douleurs lombaires ?		radio	Tous	Oui, Non	Les deux, des douleurs lombaires et sciatiques
65	>> >> Quelle position ?		checkbox	Tous	Couchée sur le dos, Couchée sur le ventre, Couchée en chien de fusil, Assise, Debout, En marchant, Autre	Oui
66	>> Depuis combien de temps avez-vous des douleurs sciatiques ?		text	Tous		Les deux, des douleurs lombaires et sciatiques
67	>> Ces douleurs sciatiques sont principalement :		radio	Tous	A droite, A gauche, Des 2 côtés	Les deux, des douleurs lombaires et sciatiques
68	>> Vos douleurs sciatiques sont principalement situées :		checkbox	Tous	Derrière la ou les cuisses, Sur le devant la ou les cuisses, Sur le coté extérieur la ou les cuisses, Derrière le ou les mollets, Sur le coté extérieur le ou les mollets, Sur le dos du ou des pieds, Sur le bord externe du ou des pieds, Autre	Les deux, des douleurs lombaires et sciatiques
69	>> Comment sont ces douleurs sciatiques ?		radio	Tous	Par crise, Permanentes, Les 2 combinés	Les deux, des douleurs lombaires et sciatiques
70	>> Qu'est-ce qui déclenche vos douleurs sciatiques ?		checkbox	Tous	Position debout, Position assise, La marche, Couché(e) la nuit, Dès que je m'assois, mes douleurs à la marche se calment et je peux repartir quelques temps, Après m'être endormi(e), je suis réveillé(e) la nuit par des douleurs sciatiques, Lorsque je tousse, que j'éternue, ou que je vais à la selle, Rien de particulier	Les deux, des douleurs lombaires et sciatiques
71	>> Précisez l'intensité de vos douleurs sciatiques :	10 étant l'intensité la plus forte	slider (0-10)	Tous		Les deux, des douleurs lombaires et sciatiques
72	>> Y a-t-il une position qui calme ces douleurs sciatiques ?		radio	Tous	Oui, Non	Les deux, des douleurs lombaires et sciatiques
73	>> >> Quelle position ?		checkbox	Tous	Couchée sur le dos, Couchée sur le ventre, Couchée en chien de fusil, Assise, Debout, En marchant, Autre	Oui
74	>> Par rapport à vos douleurs sciatiques, vos douleurs lombaires sont :		radio	Tous	Plus fortes, Aussi fortes, Moins fortes, Non applicable	Les deux, des douleurs lombaires et sciatiques
75	Vos douleurs augmentent-elles lors d'un effort (lorsque vous toussez ou à la défécation) ?		radio	Tous	Oui, Non
76	Décrivez vos autres douleurs et vos difficultés éventuelles :		checkbox	Tous	J'ai le sentiment de boiter lors de la marche, J'ai des douleurs dans une ou dans les deux fesses, Parfois, une ou mes deux jambes se dérobent et je manque de tomber, Je suis déjà tombé parce que une ou mes deux jambes m'ont lâché, Je sens que mon rachis lombaire est très raide, J'ai l'impression de "partir en avant" (tronc penché en avant) lorsque je suis debout et que je marche, J'ai des diffic…
77	Avez-vous consulté pour vos problèmes lombaires :		checkbox	Tous	Un chirurgien du rachis (orthopédiste ou neurochirurgien), Un rhumatologue, Un médecin de la douleur, Un médecin rééducateur, Autre médecin
78	Quels sont les traitements entrepris depuis le début de vos problèmes :		checkbox	Tous	Antalgiques, Morphine, Anti-inflammatoires (biprofenid, voltarene, apranax), Corticoïdes (solupred, cortancyl), Autres (lyrica, rivotril, myorel, laroxyl, lexomyl), Acupuncture, Mésothérapie, Hypnose, Autre, Aucun de ces traitements
79	>> Ces traitements ont-ils amélioré vos douleurs ?		radio	Tous	Oui, Non	Antalgiques
80	>> Ces traitements ont-ils amélioré vos douleurs ?		radio	Tous	Oui, Non	Morphine
81	>> Ces traitements ont-ils amélioré vos douleurs ?		radio	Tous	Oui, Non	Anti-inflammatoires (biprofenid, voltarene, apranax)
82	>> Ces traitements ont-ils amélioré vos douleurs ?		radio	Tous	Oui, Non	Corticoïdes (solupred, cortancyl)
83	>> Ces traitements ont-ils amélioré vos douleurs ?		radio	Tous	Oui, Non	Autres (lyrica, rivotril, myorel, laroxyl, lexomyl)
84	>> Ces traitements ont-ils amélioré vos douleurs ?		radio	Tous	Oui, Non	Acupuncture
85	>> Ces traitements ont-ils amélioré vos douleurs ?		radio	Tous	Oui, Non	Mésothérapie
86	>> Ces traitements ont-ils amélioré vos douleurs ?		radio	Tous	Oui, Non	Hypnose
87	>> Ces traitements ont-ils amélioré vos douleurs ?		radio	Tous	Oui, Non	Autre
88	>> Pourquoi ces traitements ont-ils été arrêtés ? (inefficacité, effets secondaires, vous ne voulez pas de traitement quotidien…)		text	Tous		Antalgiques
89	>> Pourquoi ces traitements ont-ils été arrêtés ? (inefficacité, effets secondaires, vous ne voulez pas de traitement quotidien…)		text	Tous		Morphine
90	>> Pourquoi ces traitements ont-ils été arrêtés ? (inefficacité, effets secondaires, vous ne voulez pas de traitement quotidien…)		text	Tous		Anti-inflammatoires (biprofenid, voltarene, apranax)
91	>> Pourquoi ces traitements ont-ils été arrêtés ? (inefficacité, effets secondaires, vous ne voulez pas de traitement quotidien…)		text	Tous		Corticoïdes (solupred, cortancyl)
92	>> Pourquoi ces traitements ont-ils été arrêtés ? (inefficacité, effets secondaires, vous ne voulez pas de traitement quotidien…)		text	Tous		Autres (lyrica, rivotril, myorel, laroxyl, lexomyl)
93	>> Pourquoi ces traitements ont-ils été arrêtés ? (inefficacité, effets secondaires, vous ne voulez pas de traitement quotidien…)		text	Tous		Acupuncture
94	>> Pourquoi ces traitements ont-ils été arrêtés ? (inefficacité, effets secondaires, vous ne voulez pas de traitement quotidien…)		text	Tous		Mésothérapie
95	>> Pourquoi ces traitements ont-ils été arrêtés ? (inefficacité, effets secondaires, vous ne voulez pas de traitement quotidien…)		text	Tous		Hypnose
96	>> Pourquoi ces traitements ont-ils été arrêtés ? (inefficacité, effets secondaires, vous ne voulez pas de traitement quotidien…)		text	Tous		Autre
97	Avez-vous eu des infiltrations lombaires ?		radio	Tous	Oui, Non
98	>> Combien ?		text	Tous		Oui
99	>> Quand ?		text	Tous		Oui
100	>> De quel type d'infiltration s'agit-il ?		checkbox	Tous	Epidurales, Intra-articulaires (ou facettaires), Foraminales, Hyatus, Je ne sais pas	Oui
101	>> Quel a été l'effet de ces infiltrations ?		radio	Tous	Amélioration durable, Amélioration temporaire, Aucune amélioration, Aggravation des douleurs	Oui
102	Avez-vous porté un corset rigide (pas une ceinture lombaire) ?		radio	Tous	Oui, Non
103	>> Le port du corset a-t-il amélioré vos douleurs ? Si oui, pendant combien de temps ?		text	Tous		Oui
104	>> Pourquoi avez-vous arrêté de porter ce corset ? (inefficacité, inconfort, vous ne souhaitez pas le porter quotidiennement...)		text	Tous		Oui
105	Avez-vous fait de la rééducation ?		radio	Tous	Oui, Non
106	>> Quel a été l'effet de ce traitement ?		radio	Tous	Amélioration durable, Amélioration temporaire, Aucune amélioration, Aggravation des douleurs	Oui
107	Avez-vous été rééduqué au sein d'un centre de rééducation fonctionnelle (type école du dos) ?		radio	Tous	Oui, Non
108	>> Quel a été l'effet de ce traitement ?		radio	Tous	Amélioration durable, Amélioration temporaire, Aucune amélioration, Aggravation des douleurs	Oui
109	Quel est votre traitement actuel :		checkbox	Tous	Antalgiques, Morphine, Anti-inflammatoires (biprofenid, voltarene, apranax), Corticoïdes (solupred, cortancyl), Autres (lyrica, rivotril, myorel, laroxyl, lexomyl), Acupuncture, Mésothérapie, Hypnose, Rééducation, Autre, Aucun
110	Au total, estimez-vous votre qualité de vie actuelle (sous traitement médical si vous en prenez un) comme :		radio	Tous	Quasi-normale, Un peu limitée, Bien entravée, Intolérable
111	Votre invalidité actuelle (sous traitement médical si vous en prenez un) peut-elle justifier à vos yeux les inconvénients et la prise de risque jamais nul d'une opération chirurgicale ?		radio	Tous	Oui, Non
112	Souhaitez-vous nous faire part d’autres informations (avis sur un diagnostic, préférence sur les traitements possibles, ...) ?		text	Tous

## Sheet: English version
Order	Question	Description	Type	Age filter	Answers	Related answer
1	What initial opinion was given to you: please indicate precisely the diagnosis and the proposed treatment		text	All
2	Have you informed your doctor of your approach?		radio	All	Yes, I have a doctor, but he doesn't know, I don't have a doctor
3	What is your height (in cm)?		text	All
4	What is your weight (in kg)?		text	All
5	Do you have a disability?		checkbox	All	Yes, autism, Yes, intellectual disability, Yes, motor disability, Yes, visual disability, Yes, hearing disability, Yes, multiple disabilities, No
6	What is your socio-professional category?		select	All	Farmers, Craftsmen, traders and business leaders, Executives and higher intellectual professions, Employees, Workers, Intermediate professions, Retirees, Without professional activity, Students, Others
7	Do you have a professional activity?		radio	All	Yes, No
8	>> What is your profession?		text	All		yes
10	>> Have you had a work accident or occupational illness?		radio	All	Yes, No	yes
11	>> >> Specify		text	All		yes
12	>> Are you currently on sick leave due to your illness?		radio	All	Yes, No	yes
13	>> Since when?		text	All		yes
14	>> Have you been off work during the past 12 months due to your illness?		radio	All	Yes, No	yes
15	>> How many months?		text	All		yes
16	Do you smoke ?		radio	All	Yes, No
17	>> How many cigarettes per day?		text	All		yes
18	>> How long have you been smoking?		text	All		yes
19	How often do you drink an alcoholic beverage?		radio	All	Never, 1 to 4 times a month, 3/4 times a week, Every day
20	Specify the number of drinks you drink daily and the type of alcohol		text	All
21	What sport do you practice (competitive, recreational, amateur, sedentary)? How often?		text	All
22	Do you have any allergies (medication, latex, radiology product, anesthesia product, food, other)?		radio	All	Yes, No
23	>> Specify the allergens and your symptoms	For example: swelling of the throat or limb, skin redness, itching, respiratory problems, etc.	text	All		yes
24	Do you have a history of spinal surgery?		radio	All	Yes, No
25	>> Specify the type of intervention and the date		text	All		yes
26	Do you have any other surgical history other than spine surgery? Please specify.		text	All
27	Do you have one or more of the following medical conditions:		checkbox	All	Heart diseases (coronary, valves, heart), Lung diseases, Arteritis of the lower limbs, Other vascular diseases (Stroke, phlebitis, pulmonary embolism), Neurological disorders (stroke, muscle weakness, other), Peptic ulcer, Liver diseases (cirrhosis, hepatitis B, other), Kidney diseases (kidney stones, kidney failure, other), Osteoarticular disorders, Gynecological or sexual organ diseases, Other,…
28	>> Specify the antecedents and their date of occurrence		text	All		Heart disease (coronary, valves, heart)
29	>> Specify the antecedents and their date of occurrence		text	All		Maladies pulmonaires
30	>> Specify the antecedents and their date of occurrence		text	All		Arteritis of the lower limbs
31	>> Specify the antecedents and their date of occurrence		text	All		Other vascular diseases (stroke, phlebitis, pulmonary embolism)
32	>> Specify the antecedents and their date of occurrence		text	All		Neurological disorders (stroke, muscle weakness, other)
33	>> Specify the antecedents and their date of occurrence		text	All		Neurological disorders (stroke, muscle weakness, other)
34	>> Specify the antecedents and their date of occurrence		text	All		Liver diseases (cirrhosis, hepatitis B, other)
35	>> Specify the antecedents and their date of occurrence		text	All		Kidney disease (kidney stones, kidney failure, other)
36	>> Specify the antecedents and their date of occurrence		text	All		Osteoarticular disorders
37	>> Specify the antecedents and their date of occurrence		text	All		Gynecological or sexual organ diseases
38	>> Specify the antecedents and their date of occurrence		text	All		Others
39	You can walk the maximum without taking a break (time or distance):		text	All
40	You can sit without standing up (time):		text	All
41	You can stand without sitting (time):		text	All
42	How long can you drive a car without a break:		text	All		yes, sciatic pain (pain that goes down from the bottom of the spine into the thighs, legs/calves and sometimes down to the feet = cruralgia)
43	You manage to go up and down the stairs:		radio	All	Normally, Step by step like little children, Only with the handrail, Impossible
44	Do you have lower back pain or sciatica?		radio	All	Yes, lower back pain (pain "in the kidneys" = lumbago), Yes, sciatic pain (pain that goes down from the bottom of the spine into the thighs, legs / calves and sometimes down to the feet = cruralgia), Both lower back pain and sciatic pain, No
45	>> How long have you had lower back pain?		text	All		yes, lower back pain (pain "in the kidneys" = lumbago)
46	>> What are these lower back pains like?		radio	All	By crisis, Permanent, The 2 combined	yes, lower back pain (pain "in the kidneys" = lumbago)
47	>> Specify the intensity of your lower back pain:	10 being the strongest intensity	slider (0-10)	All		yes, lower back pain (pain "in the kidneys" = lumbago)
48	>> What triggers your lower back pain?		checkbox	All	Standing position, Sitting position, Walking, Lying down at night, As soon as I sit down, my walking pain subsides and I can walk again for a while, After falling asleep, I am woken up at night by lower back pain, When I cough, sneeze, or have a bowel movement, Nothing special	yes, lower back pain (pain "in the kidneys" = lumbago)
49	>> Your lower back pain prevents you from walking more than (time or distance) without a break:		text	All		yes, lower back pain (pain "in the kidneys" = lumbago)
50	>> Is there a position that relieves this lower back pain?		radio	All	Yes, No	yes, lower back pain (pain "in the kidneys" = lumbago)
51	>> >> What position?		checkbox	All	Lying on back, Lying on stomach, Lying in rifle dog, Sitting, Standing, Walking, Other	yes
52	>> How long have you had sciatic pain?		text	All		yes, sciatic pain (pain that goes down from the bottom of the spine into the thighs, legs/calves and sometimes down to the feet = cruralgia)
53	>> These sciatic pains are mainly:		radio	All	Right, Left, Both sides	yes, sciatic pain (pain that goes down from the bottom of the spine into the thighs, legs/calves and sometimes down to the feet = cruralgia)
54	>> Your sciatic pain is mainly located:		checkbox	All	Behind the thigh(s), On the front of the thigh(s), On the outer side of the thigh(s), Behind the calf(s), On the outer side of the calf(s), On the back of the foot(s), On the outer edge of the foot(s), Other	yes, sciatic pain (pain that goes down from the bottom of the spine into the thighs, legs/calves and sometimes down to the feet = cruralgia)
55	>> What are these sciatic pains like?		radio	All	By crisis, Permanent, The 2 combined	yes, sciatic pain (pain that goes down from the bottom of the spine into the thighs, legs/calves and sometimes down to the feet = cruralgia)
56	>> What triggers your sciatic pain?		checkbox	All	Standing position, Sitting position, Walking, Lying down at night, As soon as I sit down, my walking pain subsides and I can walk again for a while, After falling asleep, I am woken up at night by sciatic pain, When I cough, sneeze, or have a bowel movement, Nothing special	yes, sciatic pain (pain that goes down from the bottom of the spine into the thighs, legs/calves and sometimes down to the feet = cruralgia)
57	>> Specify the intensity of your sciatic pain:	10 being the strongest intensity	slider (0-10)	All		yes, sciatic pain (pain that goes down from the bottom of the spine into the thighs, legs/calves and sometimes down to the feet = cruralgia)
58	>> Is there a position that relieves this sciatic pain?		radio	All	Yes, No	yes, sciatic pain (pain that goes down from the bottom of the spine into the thighs, legs/calves and sometimes down to the feet = cruralgia)
59	>> >> What position?		checkbox	All	Lying on back, Lying on stomach, Lying in rifle dog, Sitting, Standing, Walking, Other	yes
60	>> How long have you had lower back pain?		text	All		Both lower back pain and sciatica
61	>> Comment sont ces douleurs lombaires ?		radio	All	By crisis, Permanent, The 2 combined	Both lower back pain and sciatica
62	>> Specify the intensity of your lower back pain:	10 being the strongest intensity	slider (0-10)	All		Both lower back pain and sciatica
63	>> What triggers your lower back pain?		checkbox	All	Standing position, Sitting position, Walking, Lying down at night, As soon as I sit down, my walking pain subsides and I can walk again for a while, After falling asleep, I am woken up at night by lower back pain, When I cough, sneeze, or have a bowel movement, Nothing special	Both lower back pain and sciatica
64	>> Is there a position that relieves this lower back pain?		radio	All	Yes, No	Both lower back pain and sciatica
65	>> >> What position?		checkbox	All	Couchée sur le dos, Couchée sur le ventre, Couchée en chien de fusil, Assise, Debout, En marchant, Autre	yes
66	>> How long have you had sciatic pain?		text	All		Both lower back pain and sciatica
67	>> These sciatic pains are mainly:		radio	All	Right, Left, Both sides	Both lower back pain and sciatica
68	>> Your sciatic pain is mainly located:		checkbox	All	Behind the thigh(s), On the front of the thigh(s), On the outer side of the thigh(s), Behind the calf(s), On the outer side of the calf(s), On the back of the foot(s), On the outer edge of the foot(s), Other	Both lower back pain and sciatica
69	>> What are these sciatic pains like?		radio	All	By crisis, Permanent, The 2 combined	Both lower back pain and sciatica
70	>> What triggers your sciatic pain?		checkbox	All	Standing position, Sitting position, Walking, Lying down at night, As soon as I sit down, my walking pain subsides and I can walk again for a while, After falling asleep, I am woken up at night by sciatic pain, When I cough, sneeze, or have a bowel movement, Nothing special	Both lower back pain and sciatica
71	>> Specify the intensity of your sciatic pain:	10 being the strongest intensity	slider (0-10)	All		Both lower back pain and sciatica
72	>> Is there a position that relieves this sciatic pain?		radio	All	Yes, No	Both lower back pain and sciatica
73	>> >> What position?		checkbox	All	Lying on back, Lying on stomach, Lying in rifle dog, Sitting, Standing, Walking, Other	yes
74	>> In relation to your sciatic pain, your lower back pain is:		radio	All	Stronger, Equally strong, Less strong, Not applicable	Both lower back pain and sciatica
75	Does your pain increase during exertion (when coughing or defecating)?		radio	All	Yes, No
76	Describe your other pain and any difficulties you may have:		checkbox	All	I feel like I'm limping when I walk, I have pain in one or both buttocks, Sometimes one or both legs give way and I almost fall, I have already fallen because one or both legs gave way, I feel like my lumbar spine is very stiff, I feel like I'm "going forward" (trunk leaning forward) when I'm standing and walking, I have difficulty holding my urine, I have difficulty holding my stool, I don't fee…
77	Have you consulted for your lower back problems:		checkbox	All	Un chirurgien du rachis (orthopédiste ou neurochirurgien), Un rhumatologue, Un médecin de la douleur, Un médecin rééducateur, Autre médecin
78	What treatments have you undertaken since the start of your problems?		checkbox	All	Antalgiques, Morphine, Anti-inflammatoires (biprofenid, voltarene, apranax), Corticoïdes (solupred, cortancyl), Autres (lyrica, rivotril, myorel, laroxyl, lexomyl), Acupuncture, Mésothérapie, Hypnose, Autre, Aucun de ces traitements
79	>> Did these treatments improve your pain?		radio	All	Yes, No	Analgesics
80	>> Did these treatments improve your pain?		radio	All	Yes, No	Morphine
81	>> Did these treatments improve your pain?		radio	All	Yes, No	Anti-inflammatories (biprofenid, voltaren, apranax)
82	>> Did these treatments improve your pain?		radio	All	Yes, No	Corticosteroids (solupred, cortancyl)
83	>> Did these treatments improve your pain?		radio	All	Yes, No	Others (lyrica, rivotril, myorel, laroxyl, lexomyl)
84	>> Did these treatments improve your pain?		radio	All	Yes, No	Acupuncture
85	>> Did these treatments improve your pain?		radio	All	Yes, No	Mesotherapy
86	>> Did these treatments improve your pain?		radio	All	Yes, No	Hypnosis
87	>> Did these treatments improve your pain?		radio	All	Yes, No	Other
88	>> Why were these treatments stopped? (ineffectiveness, side effects, you don’t want daily treatment, etc.)		text	All		Analgesics
89	>> Why were these treatments stopped? (ineffectiveness, side effects, you don’t want daily treatment, etc.)		text	All		Morphine
90	>> Why were these treatments stopped? (ineffectiveness, side effects, you don’t want daily treatment, etc.)		text	All		Anti-inflammatories (biprofenid, voltaren, apranax)
91	>> Why were these treatments stopped? (ineffectiveness, side effects, you don’t want daily treatment, etc.)		text	All		Corticosteroids (solupred, cortancyl)
92	>> Why were these treatments stopped? (ineffectiveness, side effects, you don’t want daily treatment, etc.)		text	All		Others (lyrica, rivotril, myorel, laroxyl, lexomyl)
93	>> Why were these treatments stopped? (ineffectiveness, side effects, you don’t want daily treatment, etc.)		text	All		Acupuncture
94	>> Why were these treatments stopped? (ineffectiveness, side effects, you don’t want daily treatment, etc.)		text	All		Mesotherapy
95	>> Why were these treatments stopped? (ineffectiveness, side effects, you don’t want daily treatment, etc.)		text	All		Hypnosis
96	>> Why were these treatments stopped? (ineffectiveness, side effects, you don’t want daily treatment, etc.)		text	All		Other
97	Have you had lumbar injections?		radio	All	Yes, No
98	>> How much?		text	All		yes
99	>> When?		text	All		yes
100	>> What type of infiltration is this?		checkbox	All	Epidurals, Intra-articular (or facet), Foraminal, Hyatus, I don't know	yes
101	>> What was the effect of these infiltrations?		radio	All	Lasting improvement, Temporary improvement, No improvement, Worsening pain	yes
102	Did you wear a rigid corset (not a lumbar belt)?		radio	All	Yes, No
103	>> Did wearing the corset improve your pain? If so, for how long?		text	All		yes
104	>> Why did you stop wearing this corset? (ineffectiveness, discomfort, you don't want to wear it every day, etc.)		text	All		yes
105	Have you done any rehabilitation?		radio	All	Yes, No
106	>> What was the effect of this treatment?		radio	All	Lasting improvement, Temporary improvement, No improvement, Worsening pain	yes
107	Have you been rehabilitated in a functional rehabilitation center (like a back school)?		radio	All	Yes, No
108	>> What was the effect of this treatment?		radio	All	Lasting improvement, Temporary improvement, No improvement, Worsening pain	yes
109	What is your current treatment:		checkbox	All	Analgesics, Morphine, Anti-inflammatories (biprofenid, voltarene, apranax), Corticosteroids (solupred, cortancyl), Others (lyrica, rivotril, myorel, laroxyl, lexomyl), Acupuncture, Mesotherapy, Hypnosis, Rehabilitation, Other, None
110	Overall, do you rate your current quality of life (under medical treatment if you are taking any) as:		radio	All	Near normal, Somewhat limited, Well restricted, Intolerable
111	Does your current disability (under medical treatment if you are taking any) justify in your eyes the inconvenience and the never-zero risk of a surgical operation?		radio	All	Yes, No
112	Would you like to share any other information with us (opinion on a diagnosis, preference on possible treatments, etc.)?		text	All
